# Supplementary material for: Ternary polybenzoxazine/POSS/SWCNT hybrid nanocomposites stabilized through supramolecular interactions
Source: Royal Society of Chemistry journal article supplement (doi:10.1039/c5sm02569a), 2015-12-11
Supplement: c5sm02569a1.pdf [file c5sm02569a1.pdf]

## Supplementary Information

### Preparation and characterization of Polybenzoxazine/Polyhedral Oligomeric Silsesquioxane/SWCNTs Hybrid Complexes through Supramolecular Interactions

Hsi-Kang Shih,<sup>a</sup> Chun-Cheng Hsieh,<sup>b</sup> Mohamed Gamal Mohamed,<sup>b</sup> Feng-Chih Chang,<sup>a,b</sup> Chao-Yuan Zhu<sup>a,\*</sup> and Shiao-Wei Kuo<sup>b,\*</sup>

<sup>a</sup> Institute of Applied Chemistry, National Chiao Tung University, HsinChu, 300 Taiwan

<sup>b</sup> Department of Materials and Optoelectronic Science, National SunYat-Sen University, Kaohsiung, 804 Taiwan

E-mail: [kuosw@faculty.nsysu.edu.tw](mailto:kuosw@faculty.nsysu.edu.tw) (S.-W.K.); Tel.: +886-7525-4099 (S.-W.K.).

#### Experimental Section

##### **(3-(Pyren-1-yl)-3,4-dihydro-2H-benzo[e][1,3]oxazin-6-yl)methanol (Py-Bz-OH)**

A solution of 4-hydroxybenzyl alcohol (2.29 g, 18.4 mmol), pyren-1-amine (2.00 g, 9.20 mmol), and paraformaldehyde (1.38 g, 46 mmol) in dioxane/toluene/ethanol (8/8/4 mL) was heated in a 50-mL two-necked flask under N<sub>2</sub> at 100 °C for 12 h, and then the solvent was evaporated under reduced pressure. The solid residue was washed with CH<sub>2</sub>Cl<sub>2</sub> and 1 M NaOH (aq.) and then dried (MgSO<sub>4</sub>). The product was purified through column chromatography (SiO<sub>2</sub>; *n*-hexane/THF, 1:1), yielding a yellow powder (78%). <sup>1</sup>H NMR (*d*<sub>6</sub>-DMSO, ppm): 4.37 (d, 2H, ArCH<sub>2</sub>OH), 4.80 (s, 2H, CHCH<sub>2</sub>N), 5.49 (s, 2H, OCH<sub>2</sub>N), 6.83 (d, 1H, CH<sub>2</sub>OCCHCH), 7.02 (s, 1H, NCH<sub>2</sub>CCHC), 7.12 (d, 1H, CH<sub>2</sub>OCCHCHC), 7.88–8.38 (m, 9H, Py-*H*); <sup>13</sup>C NMR (*d*<sub>6</sub>-DMSO, ppm): 52.18 (CHCH<sub>2</sub>N), 62.84 (ArCH<sub>2</sub>OH), 82.07 (OCH<sub>2</sub>N), 116.39–131.13 (aromatic), 135.52 (CCH<sub>2</sub>OH), 144.02 (NCC(CH)), 153.80 (OCCH); FTIR (KBr, cm<sup>-1</sup>): 942 (out-of-plane C–H bending from oxazine ring), 1240 (Ar–O–C stretching), 3394, 3566, 3628 (Ar–OH stretching).

##### **(3-(Pyren-1-yl)-3,4-dihydro-2H-benzo[e][1,3]oxazin-6-yl)methyl Acrylate (Py-Bz-Ac)**

Py-Bz-OH (1.50 g, 4.10 mmol) and Et<sub>3</sub>N (1.25 g, 12.3 mmol) were placed in THF (20 mL) in a 50-mL two-necked flask under N<sub>2</sub> and cooled in an ice bath for 30 min. Acryloyl chloride (1.11 g, 12.3 mmol) was added and then the mixture was stirred for 3 h at room temperature. The reaction was quenched with 1 M NaHCO<sub>3</sub> and partitioned between distilled water and CH<sub>2</sub>Cl<sub>2</sub>. The organic phase was dried (MgSO<sub>4</sub>) and concentrated. The residue was purified through column chromatography (SiO<sub>2</sub>; *n*-hexane/THF, 4:1), yielding a yellow product (70%). <sup>1</sup>H NMR (*d*<sub>6</sub>-DMSO, ppm): 4.80 (s, 2H,

CHCH<sub>2</sub>N), 5.02 (s, 2H, ArCH<sub>2</sub>OC=O), 5.54 (s, 2H, OCH<sub>2</sub>N), 5.88, (d, 1H, CCH=CH<sub>2</sub>), 6.16 (dd, 1H, CCH=CH<sub>2</sub>), 6.35 (d, 1H, CCH=CH<sub>2</sub>), 6.83 (d, 1H, CH<sub>2</sub>OCCHCH), 7.02 (s, 1H, NCH<sub>2</sub>CCHC), 7.11 (d, 1H, CH<sub>2</sub>OCCHCHC), 7.88–8.38 (m, 9H, Py-*H*); <sup>13</sup>C NMR (*d*<sub>6</sub>-DMSO, ppm): 52.18 (CHCH<sub>2</sub>N), 65.2 (ArCH<sub>2</sub>OC=O), 82.07 (OCH<sub>2</sub>N), 127.85 (CH=CH<sub>2</sub>), 132.50 (CCH=CH<sub>2</sub>), 117.06–132.43 (aromatic), 144.51 [NCC(CH)], 154.53 (CHCOCH<sub>2</sub>N), 166.19 (C=O); FTIR (KBr, cm<sup>-1</sup>): 942 (out-of-plane C–H bending from oxazine ring), 1180 (C–O–C stretching), 1722 (C=O stretching).

**(3-(Pyren-1-yl)-3,4-dihydro-2*H*-benzo[*e*][1,3]oxazin-6-yl)methyl-3-(5-Methyl-2,4-dioxo-3,4-dihydropyrimidin-1(2*H*)-yl)propanoate (Py-Bz-T)**

A solution of T (1.68 g, 13.3 mmol) and Et<sub>3</sub>N (1.35 g, 13.3 mmol) in DMSO (20 mL) was heated in a 50-mL two-necked flask under N<sub>2</sub> at 55 °C for 2 h. The solution was injected into a two-necked flask under N<sub>2</sub> containing Py-Bz-Ac (1.4 g, 3.34 mmol) and then the mixture was heated at 55 °C for 24 h. The solvent was evaporated under reduced pressure. The residue was washed with CH<sub>2</sub>Cl<sub>2</sub> and then the solution was filtered to remove any unreacted T. Re-precipitation from EtOH yielded a yellow powder (58%). <sup>1</sup>H NMR (*d*<sub>6</sub>-DMSO, ppm): 1.67 (s, 3H, NCH=CCH<sub>3</sub>), 2.67 (d, 2H, O=CCH<sub>2</sub>CH<sub>2</sub>N), 3.83 (d, 2H, O=CCH<sub>2</sub>CH<sub>2</sub>N), 4.83 (s, 2H, CHCH<sub>2</sub>N), 4.93 (s, 2H, ArCH<sub>2</sub>OC=O), 5.54 (s, 2H, OCH<sub>2</sub>N), 6.87 (d, 1H, CH<sub>2</sub>OCCHCH), 7.08 (s, 1H, NCH<sub>2</sub>CCHC), 7.14 (d, 1H, CH<sub>2</sub>OCCHCHC), 7.43 (s, 1H, O=CNCH=C) 7.88–8.38 (m, 9H, Py-*H*), 11.22 (1H, O=CNHC=O); <sup>13</sup>C NMR (*d*<sub>6</sub>-DMSO, ppm): 11.96 (NCH=CCH<sub>3</sub>), 32.92 (O=CCH<sub>2</sub>CH<sub>2</sub>N), 43.95 (O=CCH<sub>2</sub>CH<sub>2</sub>N), 52.18 (CHCH<sub>2</sub>N), 65.99 (ArCH<sub>2</sub>OC=O), 82.14 (OCH<sub>2</sub>N), 108.70 (NCH=CCH<sub>3</sub>), 115.91–135.65 (aromatic), 142.43 (NCH=C), 144.49 [NCC(CH)], 151.53 (NC=ONH), 154.49 (CHCOCH<sub>2</sub>N), 165.08 (OC=O), 171.52 (NHC=OC); FTIR (KBr, cm<sup>-1</sup>): 942 (out-of-plane C–H bending of oxazine ring), 1240 (Ar–O–C stretching), 1676 (C=O stretching), 3186 (NH stretching).

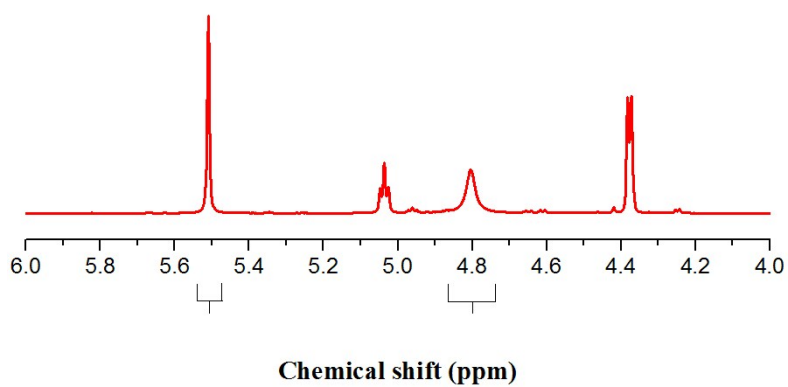

**Fig. S1** <sup>1</sup>H NMR spectrum of Py-Bz-OH.

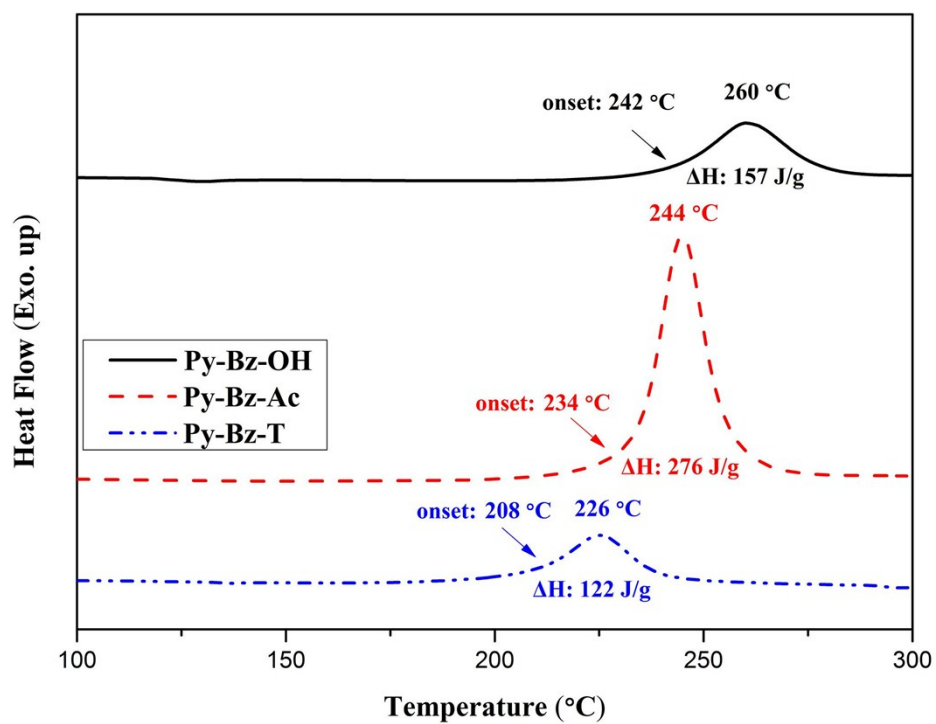

**Fig. S2** DSC thermograms of Py-Bz-OH, Py-Bz-Ac, and Py-Bz-T.

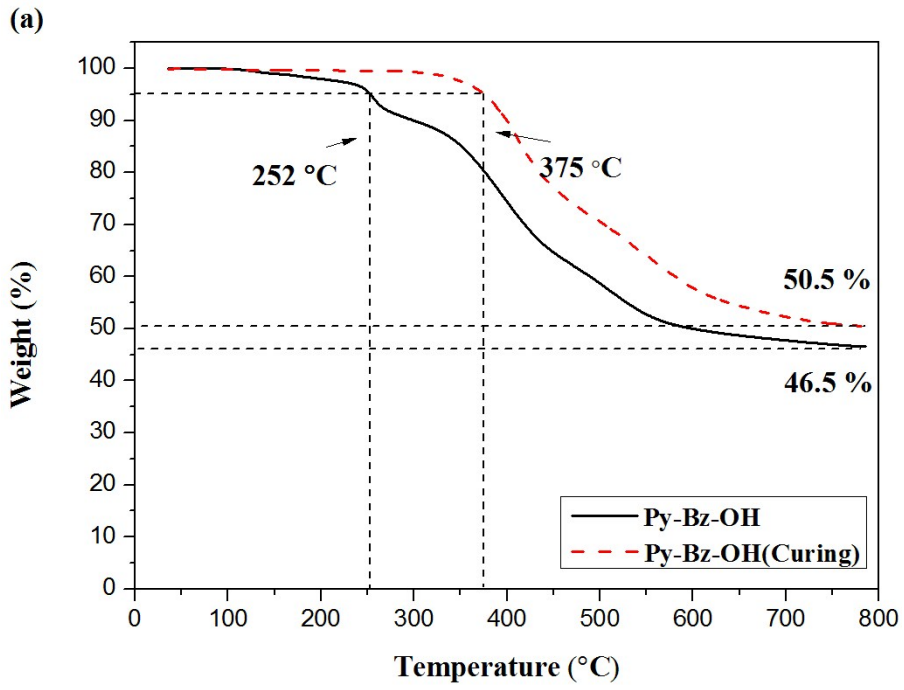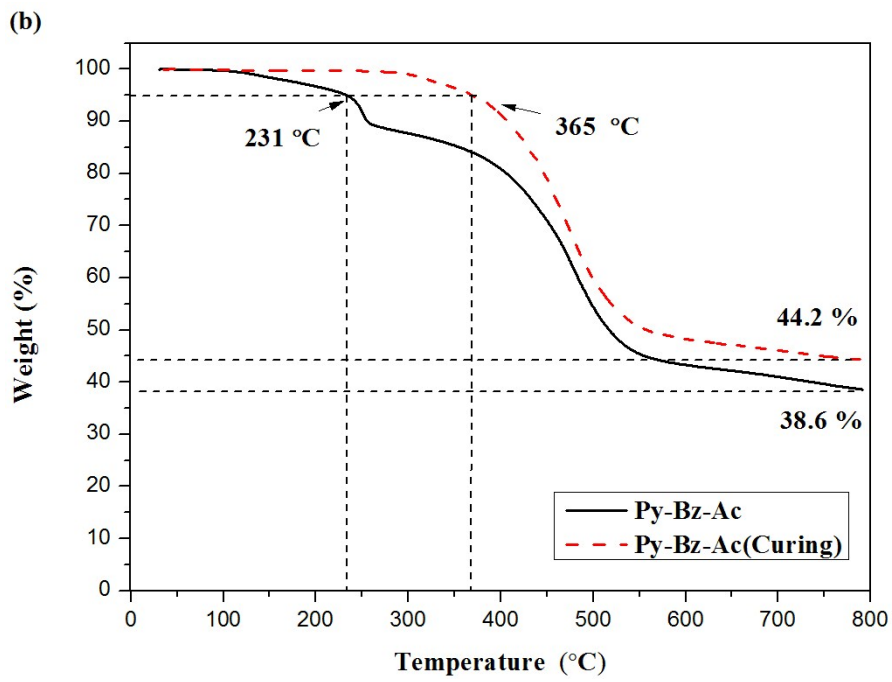

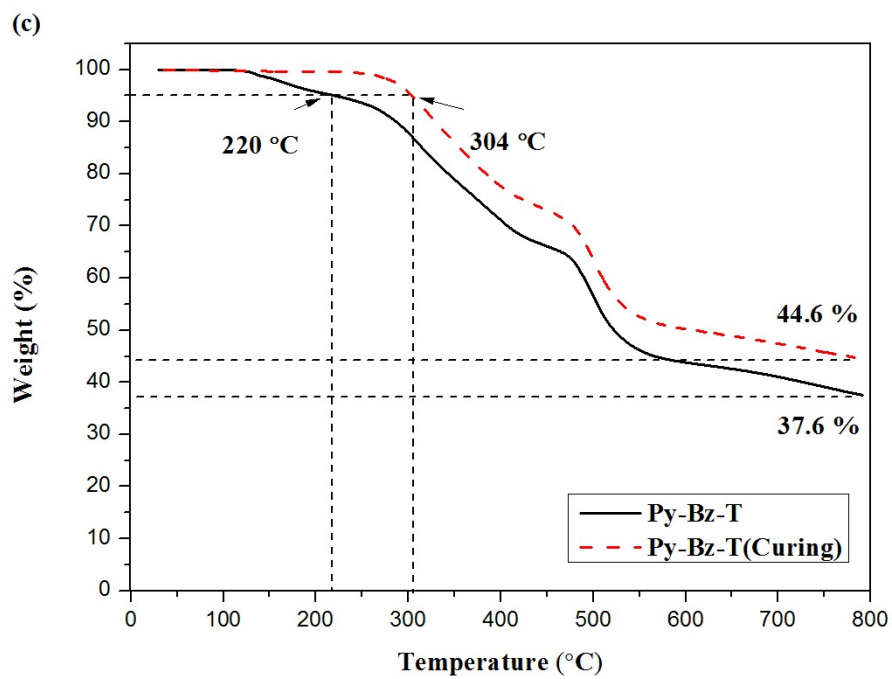

**Fig. S3** TGA traces of (a) Py-Bz-OH and cured Py-Bz-OH; (b) Py-Bz-Ac and cured Py-Bz-Ac; (c) Py-Bz-T and cured Py-Bz-T.

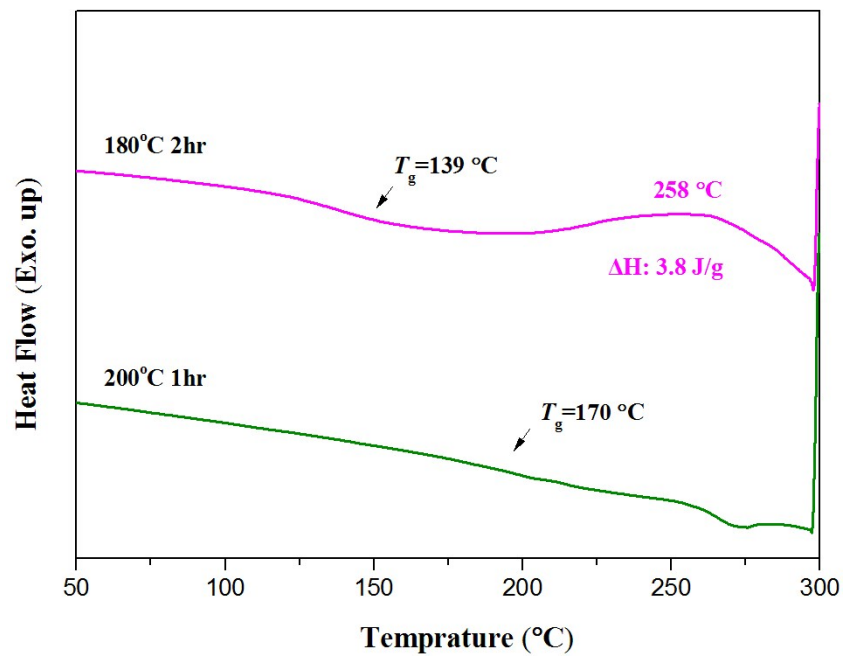

**Fig. S4** DSC thermograms of of Py-Bz-T, recorded after 180 °C 2 h, and 200 °C 1 h.

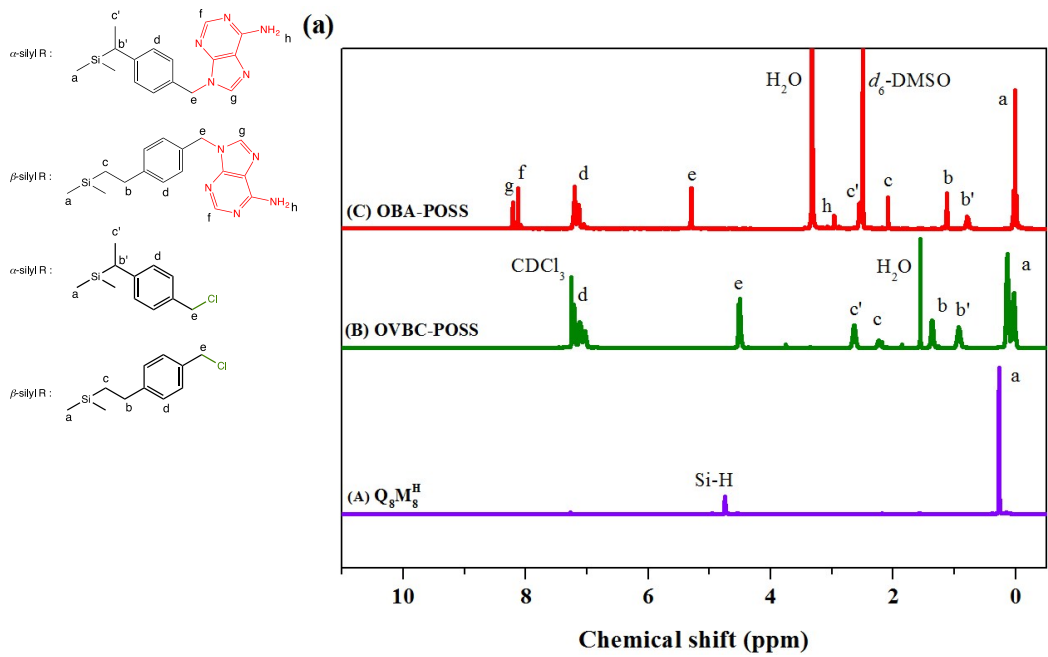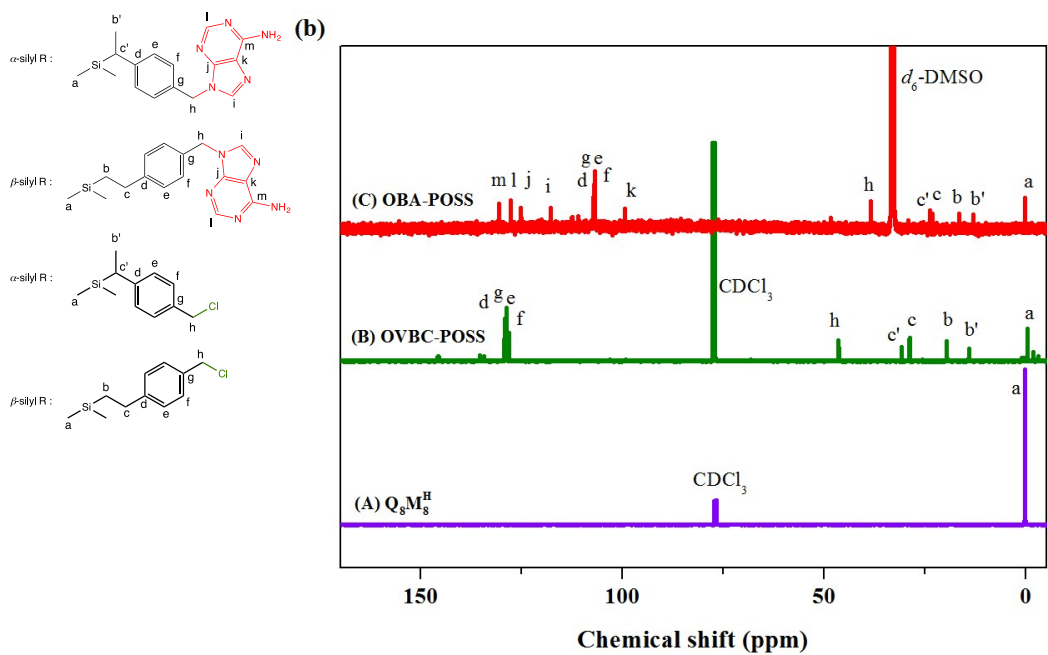

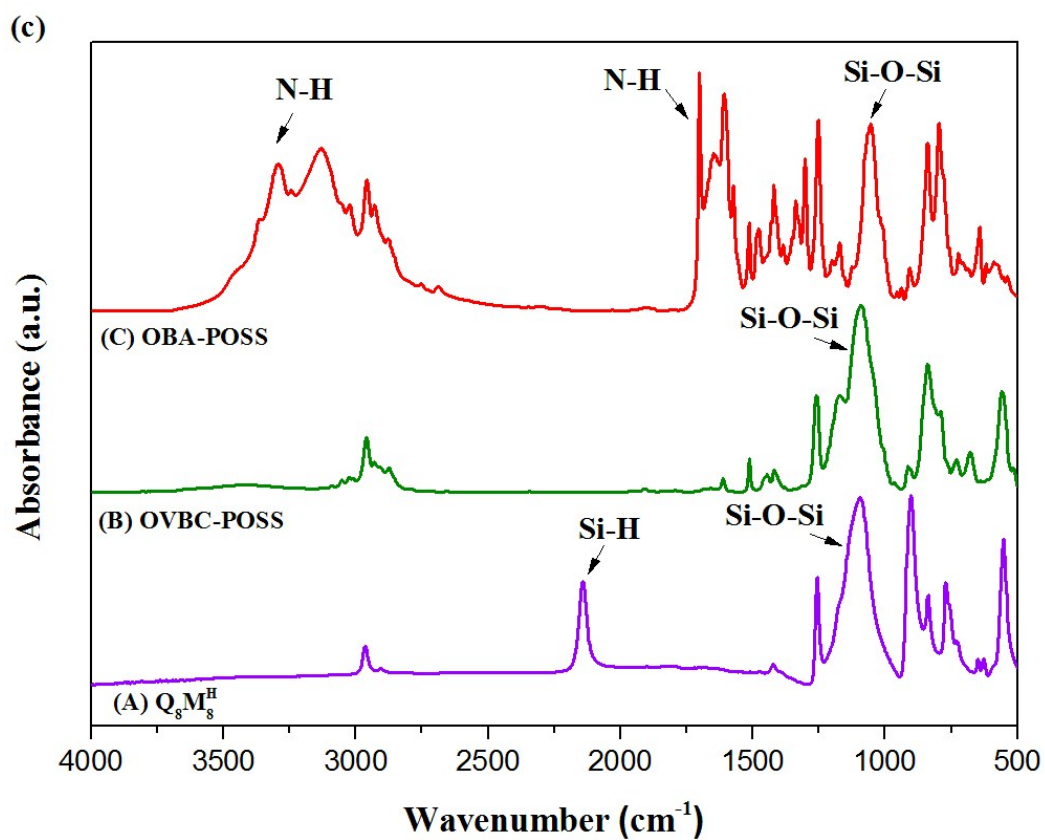

**Fig. S5** (a)  $^1\text{H}$  NMR spectra, (b)  $^{13}\text{C}$  NMR spectra, and (c) FTIR spectra of  $\text{Q}_8\text{M}_8$ , OVBC-POSS, and OBA-POSS.



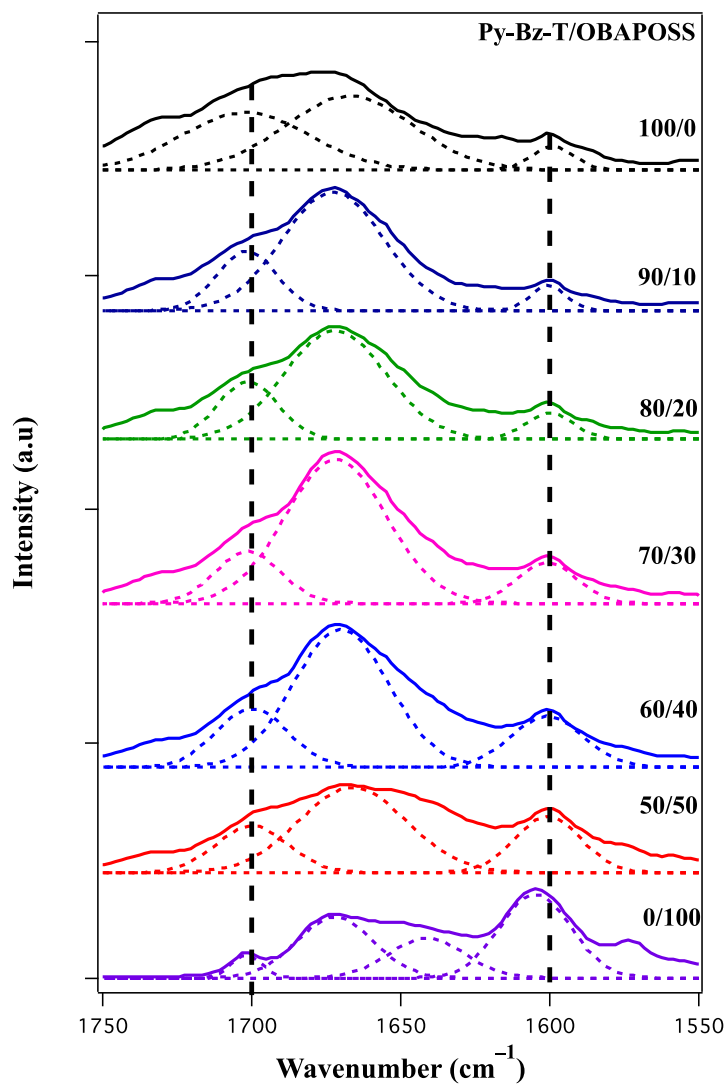

**Fig. S6** FTIR spectra and fitting results with different wt% of Py-Bz-T/OBA- POSS nanocomposite at 1750-1550  $\text{cm}^{-1}$  region.

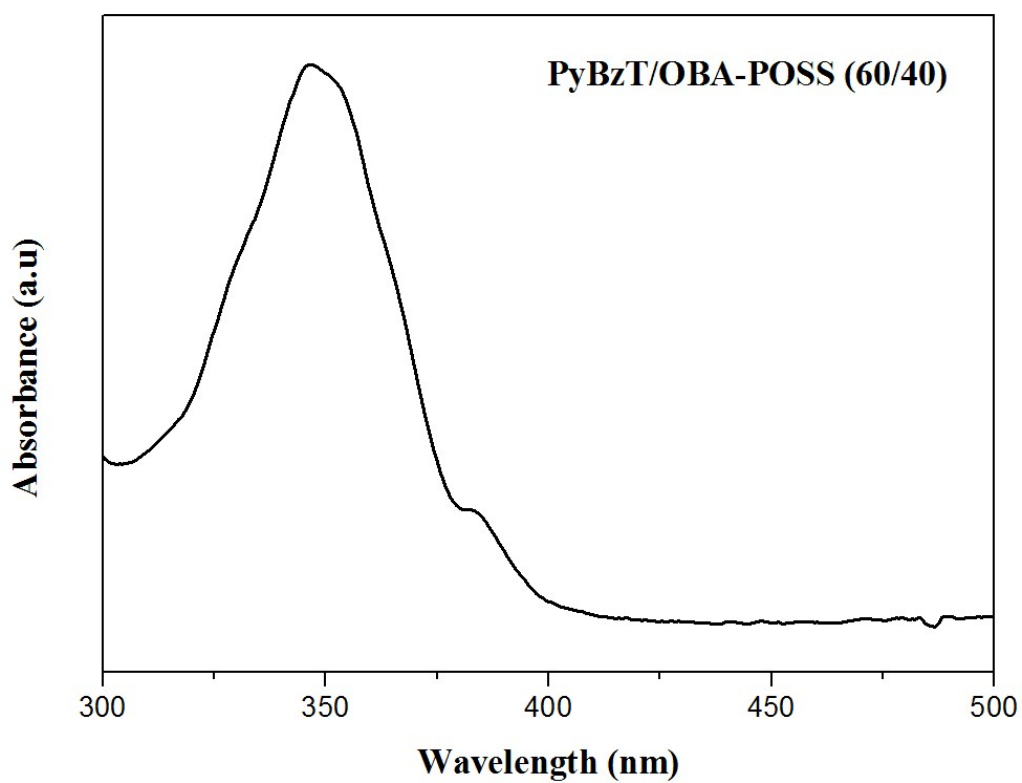

**Fig. S7** UV-vis spectrum of Py-Bz-T/OBA-POSS nanocomposite (60/40).
